# Supplementary material for: The Mediating Effect of Inflammation between the Dietary and Health-Related Behaviors and Metabolic Syndrome in Adolescence
Source: MDPI journal article supplement (doi:10.3390/nu14112339), 2022-06-02
Supplement: s1 [file s1]

**Table S1.** The fit index for each latent class model.

|                           | <b>Class 2</b> | <b>Class 3</b> | <b>Class 4</b> | <b>Class 5</b> |
|---------------------------|----------------|----------------|----------------|----------------|
| AIC                       | 31.30          | 39.36          | 50.97          | 62.12          |
| BIC                       | 69.99          | 99.15          | 131.87         | 164.13         |
| Adjusted BIC              | 35.12          | 45.26          | 58.96          | 72.20          |
| Likelihood G <sup>2</sup> | 9.30           | 5.36           | 4.97           | 4.12           |
| CAIC                      | 80.99          | 116.15         | 154.87         | 193.13         |

AIC: Akaike Information Criteria; BIC: Bayesian Information Criteria; CAIC: conditional Akaike Information Criteria; Adjusted BIC: Adjusted Bayesian Information Criteria; Likelihood G<sup>2</sup>: Likelihood G-squared.
